# Supplementary material
Source: HighWire-hosted journal article supplement (https://bmjopen.bmj.com/content/11/11/e055930)
Supplement: inline-supplementary-material-1 [file inline-supplementary-material-1.pdf]

## INSTRUCTIONS FOR USING YOUR PILL BOTTLE

This electronic pill bottle is **the same as your regular pill bottle**, but the cap records when you open and close the bottle. Over the next 6 months, we will use the bottle to measure when you take your medication. In order to set up the bottle, **please follow the instructions below:**

**Place your pills into the provided vials and place the appropriate cap on the vial.**

You should only use the electronic cap for study medications:

- [Medication 1]
- [Medication 2]

**Download the Pillsy mobile application from the Apple Store or Android App Store.**

By searching “Pillsy” you will be able to find it. Make sure you enable push notifications so you will know if there is a connectivity issue between the application and the bottle.

Please contact us at [RA phone number] or email me at [RA email]

## STOP HERE – CALL US TO SET UP THE BOTTLE

---

**Give us a call to finalize the bottle set up.** Once you complete the steps above, you will be asked for a security code. The security code is sent to one of our study phones, and as such we will need to have a quick conversation on the phone to help you set up the bottle. **We will give you a call a few days after mailing the bottle, but please feel free to contact us once you receive it.**

**Make the pill bottle part of your daily routine.** The questions below will help you decide where to place your pill bottle and remember to use it as part of your routine.

## INSTRUCTIONS FOR USING YOUR PILL BOTTLE

People have different ways of taking their medications daily. **What do you tend to do most of the time?**

I take my [*medication*] at \_\_\_\_ AM/PM

**What do you also do around the same time? Could you use that activity as a reminder to take your medication?**

You can choose an activity from one of the examples below or come up with your own.

| EXAMPLES                                                                          |                                                                                   |                                                                                     |
|-----------------------------------------------------------------------------------|-----------------------------------------------------------------------------------|-------------------------------------------------------------------------------------|
|  |  |  |
| Getting dressed<br>Making coffee/tea<br>_____                                     | Eating lunch<br>Leaving from work<br>_____                                        | Reading before bed<br>Brushing your teeth<br>_____                                  |

I will now take my medication when I... \_\_\_\_\_

In the blanks below, write down how you will remember that it's time to take your medication.

| EXAMPLE                                                                |                                                    |
|------------------------------------------------------------------------|----------------------------------------------------|
| To remember to take my medication when I<br><i>make my morning tea</i> | I will <i>place my pill bottle near the kettle</i> |
| MY COMMITMENT                                                          |                                                    |
| To remember to take my medication when<br>I _____                      | I will _____<br>_____                              |

So, as you go about your regular routine, **you will now also think to yourself, "time to take my medication!"**
