# Supplementary material
Source: HighWire-hosted journal article supplement (https://bmjopen.bmj.com/content/11/11/e055930)
Supplement: inline-supplementary-material-4 [file inline-supplementary-material-4.pdf]

### Reward Text Messages

**Initial sample message:** Welcome! Each time you take your medications this week, a donation will be made to \_\_\_\_\_ to help [mission].

**Follow-up messages:** By taking your medication, you helped [mission]. Thanks to you, [charity] will be able to [X]

- By taking your medication, you helped take care of animals. Thanks to you, the Animal Rescue League has been able to feed a homeless dog for 2 days.
- By taking your medication, you helped people struggling with hunger. Thanks to you, the Greater Boston Area Food Bank has been able to prepare 8 free meals.
- By taking your medication, you helped improve children's health. Thanks to you, UNICEF has been able to provide a family with 1 week of clean water.

#### Reward by PDC:

| PDC   | Animal Rescue League            | Food bank             | UNICEF                                        |
|-------|---------------------------------|-----------------------|-----------------------------------------------|
| 0%    | Feed a homeless dog for 0 days. | Prepare 0 free meals. | Provide a family with 0 days of clean water.  |
| 12.5% | Feed a homeless dog for 1 day   | Prepare 1 free meals. | Provide a family with 2 days of clean water.  |
| 25%   | Feed a homeless dog for 2 days. | Prepare 2 free meals. | Provide a family with 4 days of clean water.  |
| 37.5% | Feed a homeless dog for 3 days  | Prepare 3 free meals. | Provide a family with 6 days of clean water.  |
| 50%   | Feed a homeless dog for 4 days. | Prepare 4 free meals. | Provide a family with 1 week of clean water.  |
| 62.5% | Feed a homeless dog for 5 days  | Prepare 5 free meals. | Provide a family with 8 days of clean water.  |
| 75%   | Feed a homeless dog for 6 days. | Prepare 6 free meals. | Provide a family with 10 days of clean water. |
| 87.5% | Feed a homeless dog for 7 days  | Prepare 7 free meals. | Provide a family with 12 days of clean water. |
| 100%  | Feed a homeless dog for 8 days. | Prepare 8 free meals. | Provide a family with 2 weeks of clean water. |

#### Timepoints at which texts will be received:

| Timeline | Animal Rescue League                | Food bank                 | UNICEF                                    |
|----------|-------------------------------------|---------------------------|-------------------------------------------|
| Day + 4  | Feed a homeless dog for [0-8] days. | Prepare [0-8] free meals. | a family with [0-2] weeks of clean water. |
| Day + 8  | Feed a homeless dog for [0-8] days. | Prepare [0-8] free meals. | a family with [0-2] weeks of clean water. |
| Day + 12 | Feed a homeless dog for [0-8] days. | Prepare [0-8] free meals. | a family with [0-2] weeks of clean water. |
| Day + 16 | Feed a homeless dog for [0-8] days. | Prepare [0-8] free meals. | a family with [0-2] weeks of clean water. |
| Day + 20 | Feed a homeless dog for [0-8] days. | Prepare [0-8] free meals. | a family with [0-2] weeks of clean water. |
| Day + 24 | Feed a homeless dog for [0-8] days. | Prepare [0-8] free meals. | a family with [0-2] weeks of clean water. |
| Day + 28 | Feed a homeless dog for [0-8] days. | Prepare [0-8] free meals. | a family with [0-2] weeks of clean water. |
| Day + 32 | Feed a homeless dog for [0-8] days. | Prepare [0-8] free meals. | a family with [0-2] weeks of clean water. |
| Day + 36 | Feed a homeless dog for [0-8] days. | Prepare [0-8] free meals. | a family with [0-2] weeks of clean water. |
| Day + 40 | Feed a homeless dog for [0-8] days. | Prepare [0-8] free meals. | a family with [0-2] weeks of clean water. |
| Day + 44 | Feed a homeless dog for [0-8] days. | Prepare [0-8] free meals. | a family with [0-2] weeks of clean water. |
| Day + 48 | Feed a homeless dog for [0-8] days. | Prepare [0-8] free meals. | a family with [0-2] weeks of clean water. |
| Day + 52 | Feed a homeless dog for [0-8] days. | Prepare [0-8] free meals. | a family with [0-2] weeks of clean water. |
| Day + 56 | Feed a homeless dog for [0-8] days. | Prepare [0-8] free meals. | a family with [0-2] weeks of clean water. |
| Day + 60 | Feed a homeless dog for [0-8] days. | Prepare [0-8] free meals. | a family with [0-2] weeks of clean water. |
| Day + 64 | Feed a homeless dog for [0-8] days. | Prepare [0-8] free meals. | a family with [0-2] weeks of clean water. |
| Day + 68 | Feed a homeless dog for [0-8] days. | Prepare [0-8] free meals. | a family with [0-2] weeks of clean water. |
| Day + 72 | Feed a homeless dog for [0-8] days. | Prepare [0-8] free meals. | a family with [0-2] weeks of clean water. |
| Day + 76 | Feed a homeless dog for [0-8] days. | Prepare [0-8] free meals. | a family with [0-2] weeks of clean water. |
| Day + 80 | Feed a homeless dog for [0-8] days. | Prepare [0-8] free meals. | a family with [0-2] weeks of clean water. |
| Day + 84 | Feed a homeless dog for [0-8] days. | Prepare [0-8] free meals. | a family with [0-2] weeks of clean water. |
| Day + 88 | Feed a homeless dog for [0-8] days. | Prepare [0-8] free meals. | a family with [0-2] weeks of clean water. |
| Day + 92 | Feed a homeless dog for [0-8] days. | Prepare [0-8] free meals. | a family with [0-2] weeks of clean water. |

### Reward Text Messages
