# Supplementary material
Source: HighWire-hosted journal article supplement (https://bmjopen.bmj.com/content/11/11/e055930)
Supplement: inline-supplementary-material-5 [file inline-supplementary-material-5.pdf]

## BASELINE SURVEY

### DEMOGRAPHICS

- 1) How old are you (in years)? \_\_\_\_\_
- 2) What is your gender? \_\_\_\_\_
- 3) What is your race/ethnicity? (select multiple options if applicable)
  - White
  - Black or African American
  - American Indian/ Alaska Native
  - Asian
  - Native Hawaiian or Other Pacific Islander
  - Hispanic/Latinx
- 4) What is your education level?
  - Less than high school diploma
  - High school diploma
  - Some college
  - College degree
  - Graduate degree
- 5) What is your employment status?
  - Employed
  - Job seeking
  - Not job seeking
  - Retired
  - Disabled
- 6) What is your income?
  - Less than \$20,000
  - \$20,000 to \$34,999
  - \$35,000 to \$49,999
  - \$50,000 to \$74,999

## BASELINE SURVEY

- \$75,000 to \$99,999
- Over \$100,000

**7) What is your marital status?**

- Married
- Living with partner/ Domestic partnership
- Widowed
- Divorced/ Separated
- Never Married/ Single

**8) How many medications are you currently taking on a daily basis?**

\_\_\_\_\_

**9) How many medications do you take on a weekly or every other week basis? \_\_\_\_\_**

## BASELINE SURVEY

### DISEASE ACTIVITY

**1. Are you having a gout attack (flare) today?**

- Yes
- No

**2. Are any of your joints swollen?**

- Yes
- No

**3. Are any of your joints warm to touch?**

- Yes
- No

**4. Considering pain from your gout over the last 1 week when you are resting (for example in bed or sitting quietly) please circle the number indicating the level of pain when it was at its worst:**

|                       |                       |                       |                       |                       |                       |                       |                       |                       |                       |
|-----------------------|-----------------------|-----------------------|-----------------------|-----------------------|-----------------------|-----------------------|-----------------------|-----------------------|-----------------------|
| <input type="radio"/> |
| 1                     | 2                     | 3                     | 4                     | 5                     | 6                     | 7                     | 8                     | 9                     | 10                    |

## BASELINE SURVEY

### MEDICATION USE

*We have printed out your medication list. Please circle the medications your doctor has prescribed for at least 4 months.*

---



---

*Please list the medications your rheumatologist prescribes that you take at least once a day.*

---



---

*Please answer the following questions about your gout medication(s). These questions are about your views on your health and medication(s). There are no right or wrong answers. We are interested in your personal views. All answers will be private and confidential, so please answer honestly.*

In the last 30 days, on how many *days* did you miss at least one dose of any of this medication?

|   |                                 |  |
|---|---------------------------------|--|
| 1 | Write in number of days (0-30): |  |
|---|---------------------------------|--|

|   |                                                                                                              | Very poor | Poor | Fair | Good | Very good | Excellent |
|---|--------------------------------------------------------------------------------------------------------------|-----------|------|------|------|-----------|-----------|
| 2 | In the last 30 days, how good a job did you do at taking your medication(s) in the way you were supposed to? | ○         | ○    | ○    | ○    | ○         | ○         |

## BASELINE SURVEY

|   |                                                                                                 | Never                 | Rarely                | Sometimes             | Usually               | Almost always         | Always                |
|---|-------------------------------------------------------------------------------------------------|-----------------------|-----------------------|-----------------------|-----------------------|-----------------------|-----------------------|
| 3 | In the last 30 days, how often did you take your medication(s) in the way you were supposed to? | <input type="radio"/> |

Please rate each statement from 1(not at all) to 7 (very much so) by circling the number you think most closely aligns with your opinion.

|    |                                                                                                                       | 1<br>(Not at all)     | 2                     | 3                     | 4                     | 5                     | 6                     | 7<br>(Very much so)   |
|----|-----------------------------------------------------------------------------------------------------------------------|-----------------------|-----------------------|-----------------------|-----------------------|-----------------------|-----------------------|-----------------------|
| 4  | Taking my medication(s) is part of a routine I have                                                                   | <input type="radio"/> |
| 5  | I typically take my medication(s) at the same time of the day                                                         | <input type="radio"/> |
| 6  | I take my medication(s) a certain way and will continue to do so this way in the future                               | <input type="radio"/> |
| 6b | When I take my medications, it's usually in the same place (e.g., bathroom, kitchen).                                 | <input type="radio"/> |
| 6c | When taking my medications, there's something I typically do right before (e.g., brush teeth, sit down at the table)? | <input type="radio"/> |
| 6d | I usually drink water when I take my medications.                                                                     | <input type="radio"/> |
| 6e | I have a cup/ glass I typically use when I take my medications.                                                       | <input type="radio"/> |
| 6f | I usually keep all of my medications in the same place in my home.                                                    | <input type="radio"/> |

## BASELINE SURVEY

Please answer whether each statement is true about you by circling YES or NO.

Taking my daily medication is something....

7. I do automatically ..... YES NO  
 8. I do without having to consciously remember ..... YES NO  
 9. I do without thinking ..... YES NO  
 10. I start doing before I realize I'm doing it ..... YES NO

Please mark one circle in each row to show how much you agree or disagree with the statement.

|    |                                                                                                                        | Strongly disagree     | Disagree              | Neutral               | Agree                 | Strongly agree        |
|----|------------------------------------------------------------------------------------------------------------------------|-----------------------|-----------------------|-----------------------|-----------------------|-----------------------|
| 11 | Coming regularly to my clinic appointments is good for my health.                                                      | <input type="radio"/> |
| 12 | My treatment plan for arthritis/lupus/gout will make a big difference in keeping my rheumatic condition under control. | <input type="radio"/> |
| 13 | Medications help to control arthritis/lupus/gout                                                                       | <input type="radio"/> |
| 14 | If medications are prescribed, it's important to take the medications every day to control rheumatic disease           | <input type="radio"/> |
| 15 | Not taking medications every day affects how well the arthritis/lupus/gout treatment works                             | <input type="radio"/> |
| 16 | An arthritis/lupus/gout patient who is feeling well can safely stop taking rheumatic medications                       | <input type="radio"/> |
| 17 | An arthritis/lupus/gout patient who follows recommended care for arthritis/lupus/gout can expect to live long          | <input type="radio"/> |
| 18 | There is a lot I can do to control my arthritis/lupus/gout                                                             | <input type="radio"/> |
| 19 | What I do can determine whether my arthritis/lupus/gout gets better or worse                                           | <input type="radio"/> |
| 20 | My actions will have no effect on the outcome of my arthritis/lupus/gout                                               | <input type="radio"/> |
